# Supplementary material for: Student Perceived and Determined Knowledge of Biology Concepts in an Upper-Level Biology Course
Source: Atypon-hosted journal article supplement (doi:10.1187/cbe.13-09-0175), 2014-06-01
Supplement: combinedsupmats1.pdf [file combinedsupmats1.pdf]

# Supplemental Material

*CBE—Life Sciences Education*

Ziegler *et al.*

### Concepts in Physiological Ecology

Adaptation  
 Fitness  
 Natural Selection  
 Acclimation  
 Phenotype  
 Genotype  
 Phylogeny  
 Trade-offs

Constraints  
 Evolution  
 Efficiency  
 Isometric  
 Allometric  
 Metabolism  
 Homeostasis  
 Allostasis

Symmorphosis  
 Osmosis  
 Diffusion  
 Acquisition  
 Allocation  
 Emergent properties  
 Life History  
 Phenotypic Plasticity

| Biological Concepts I know | Biological Concepts I sort of know | Biological Concepts I've heard of, but don't know | Biological Concepts I've <u>never</u> heard of before |
|----------------------------|------------------------------------|---------------------------------------------------|-------------------------------------------------------|
|                            |                                    |                                                   |                                                       |

### Concepts that group together

|  |  |  |  |
|--|--|--|--|
|  |  |  |  |
|  |  |  |  |

## Definitions, examples and synonyms

|                   |  |
|-------------------|--|
| Adaptation        |  |
| Natural Selection |  |
| Acclimation       |  |
| Genotype          |  |
| Constraints       |  |
| Efficiency        |  |
| Allometric        |  |
| Homeostasis       |  |
| Symmorphosis      |  |
| Diffusion         |  |
| Fitness           |  |

|                        |  |
|------------------------|--|
| Metabolism             |  |
| Phenotype              |  |
| Trade-offs             |  |
| Evolution              |  |
| Isometric              |  |
| Allocation             |  |
| Phylogeny              |  |
| Allostasis             |  |
| Osmosis                |  |
| Emergent<br>Properties |  |
| Acquisition            |  |
| Life History           |  |

|                          |  |
|--------------------------|--|
| Phenotypic<br>plasticity |  |
|--------------------------|--|
